# Supplementary material
Source: PubMed Central journal article supplement (PMC9218941)

### **New Phytologist Supporting Information**

Article title: Plasticity, pleiotropy and fitness tradeoffs in Arabidopsis genotypes with different telomere lengths

Authors: Brandon E. Campitelli, Samsad Razzaque, Borja Barbero, Liliia R. Abdulkina, Mitchell H. Hall, Dorothy E. Shippen, Thomas E. Juenger and Eugene V. Shakirov.

Article acceptance date: 14 November 2021

### **Supplemental Data 4.**

Boxplots overlain with imputed values for all 32 of the traits included in this manuscript. Boxes show the 1st and 3rd quartiles (i.e., 25th and 75th percentiles) and the horizontal line shows the median. Whiskers extend to either the largest (upper whisker) or smallest (lower whisker) value no further than 1.5x of the inter-quartile range (distance between the 1st and 3rd quartile). Points show raw data, and any points that are beyond the whiskers represent outliers.

## To\_1L boxplots

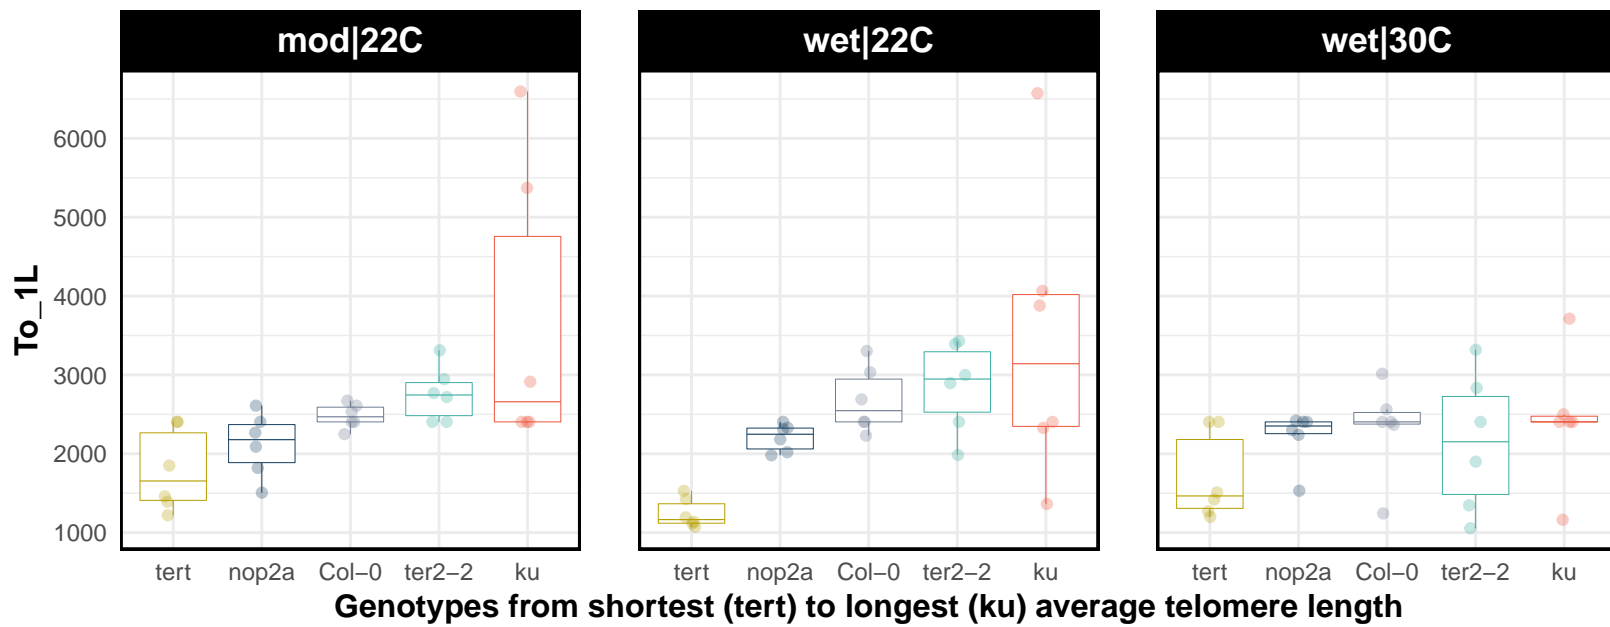

## Tf\_1L boxplots

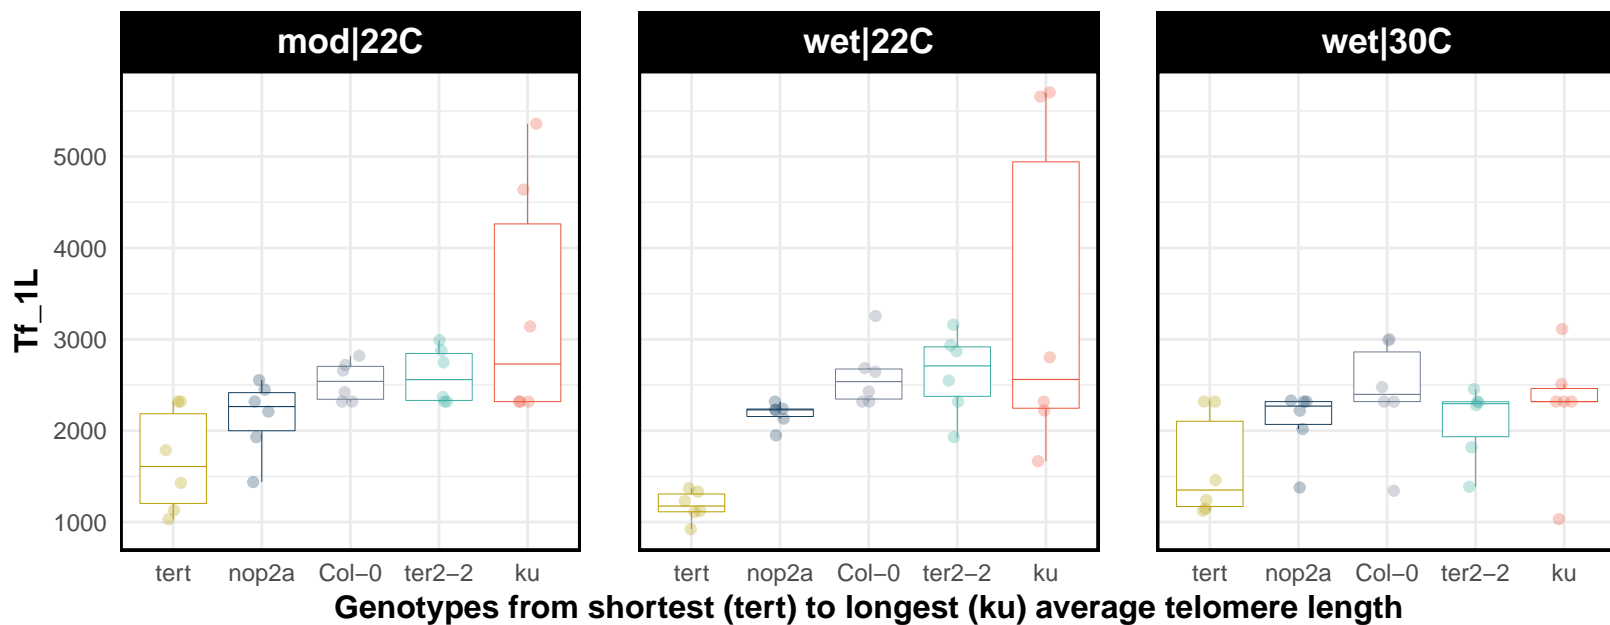

## Tf\_To\_1L boxplots

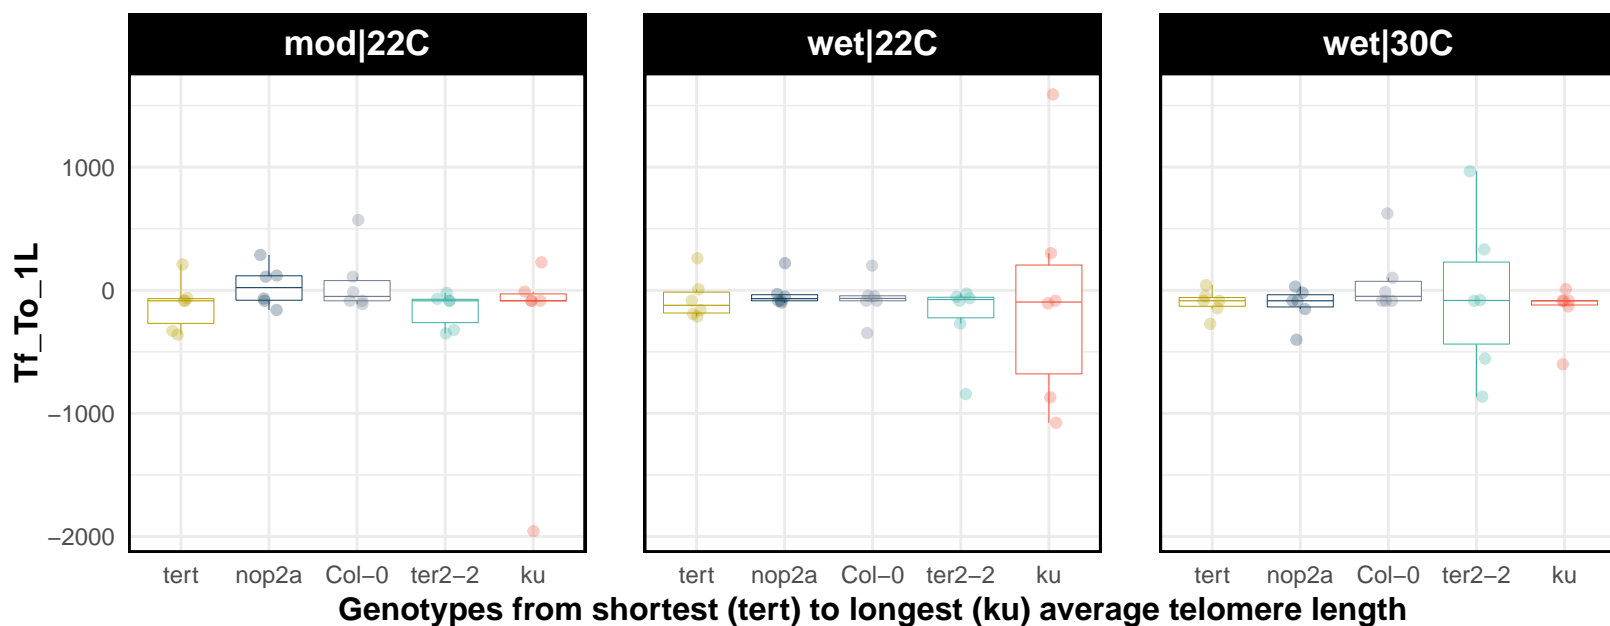

## To\_2R boxplots

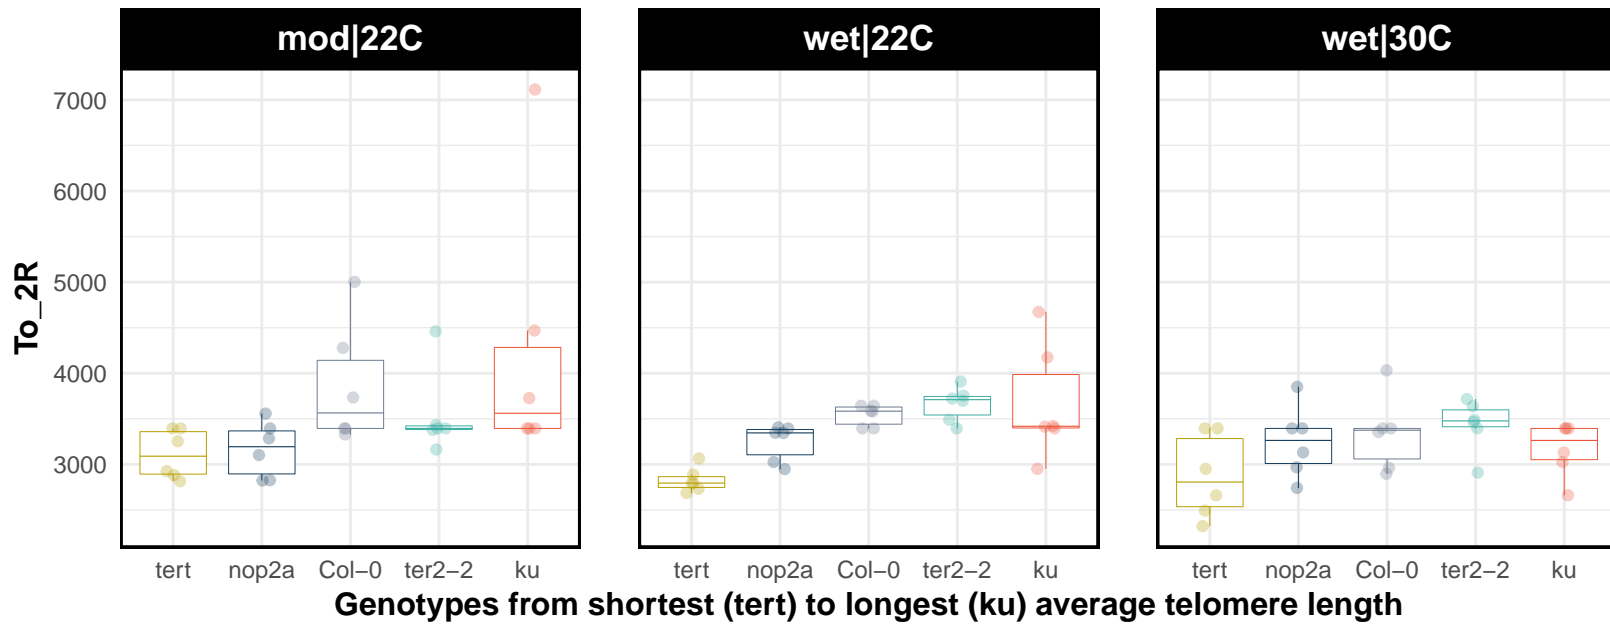

## Tf\_2R boxplots

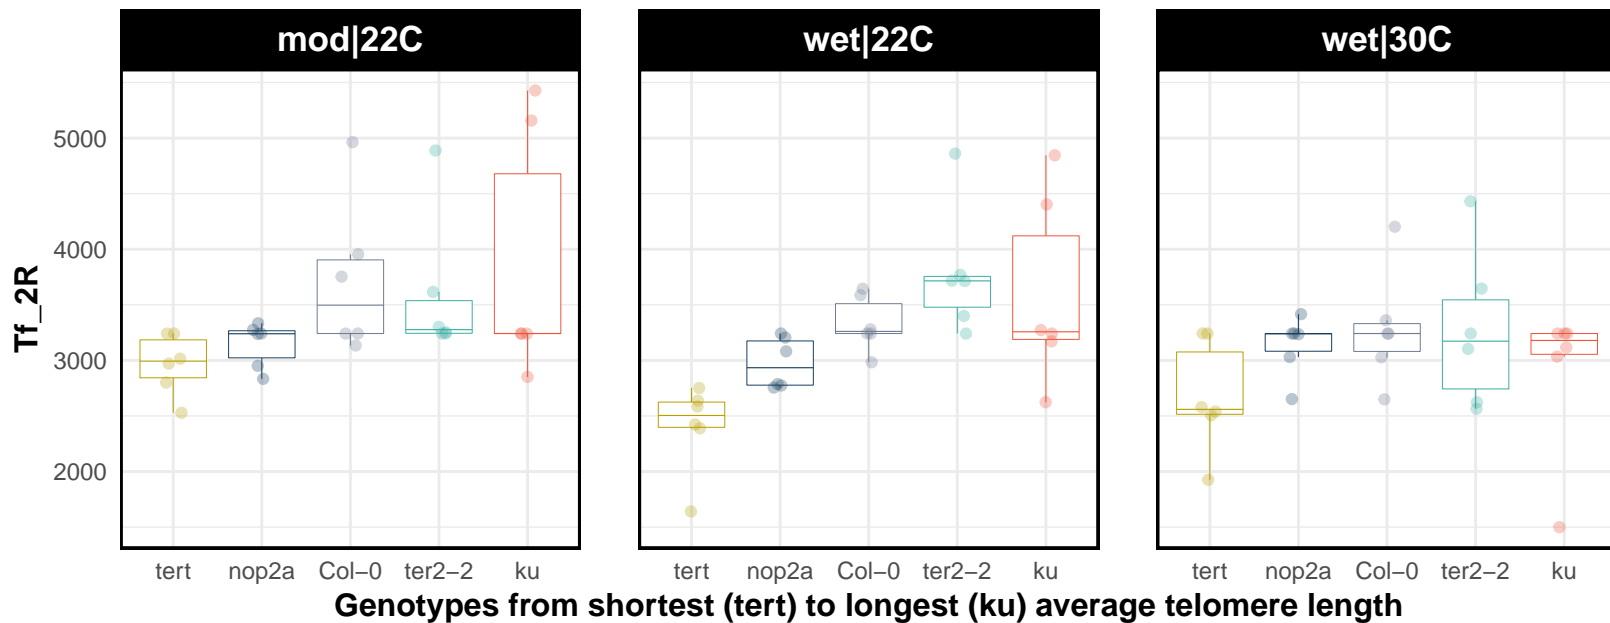

## Tf\_To\_2R boxplots

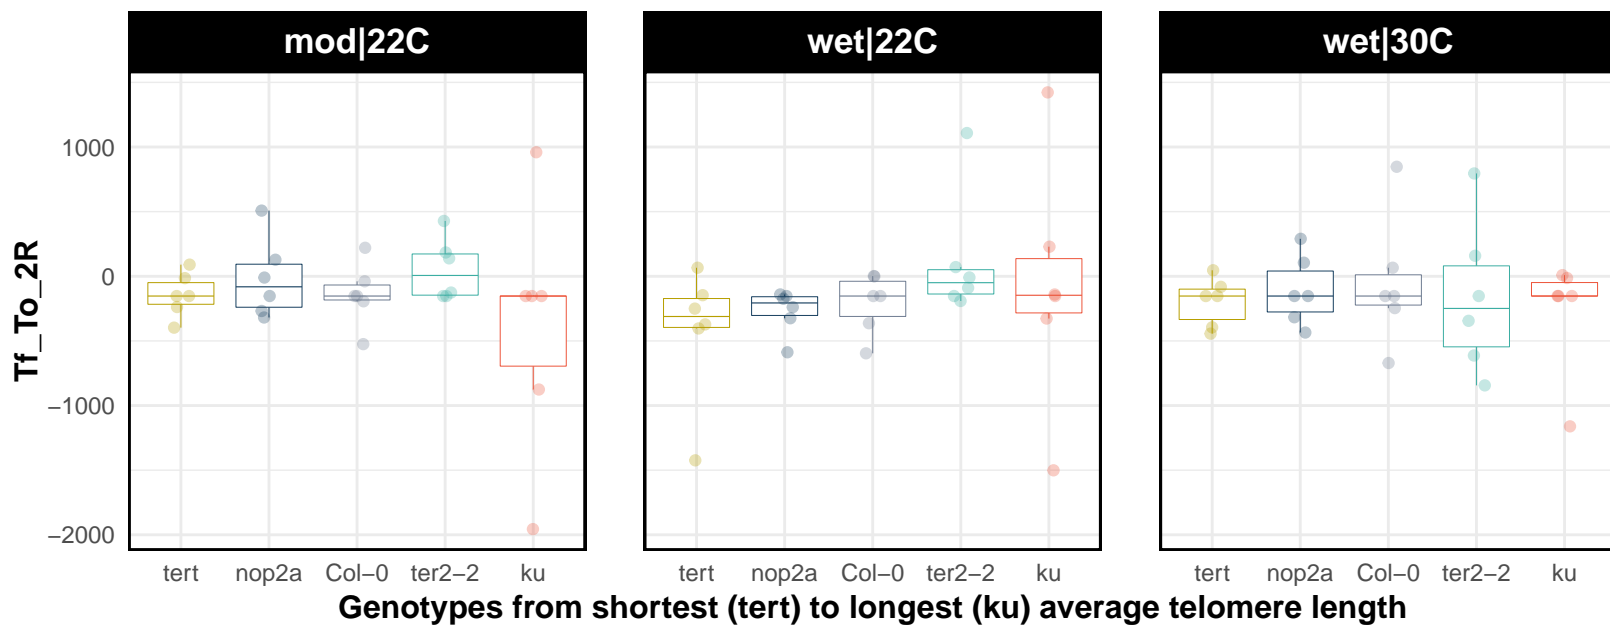

## To\_5R boxplots

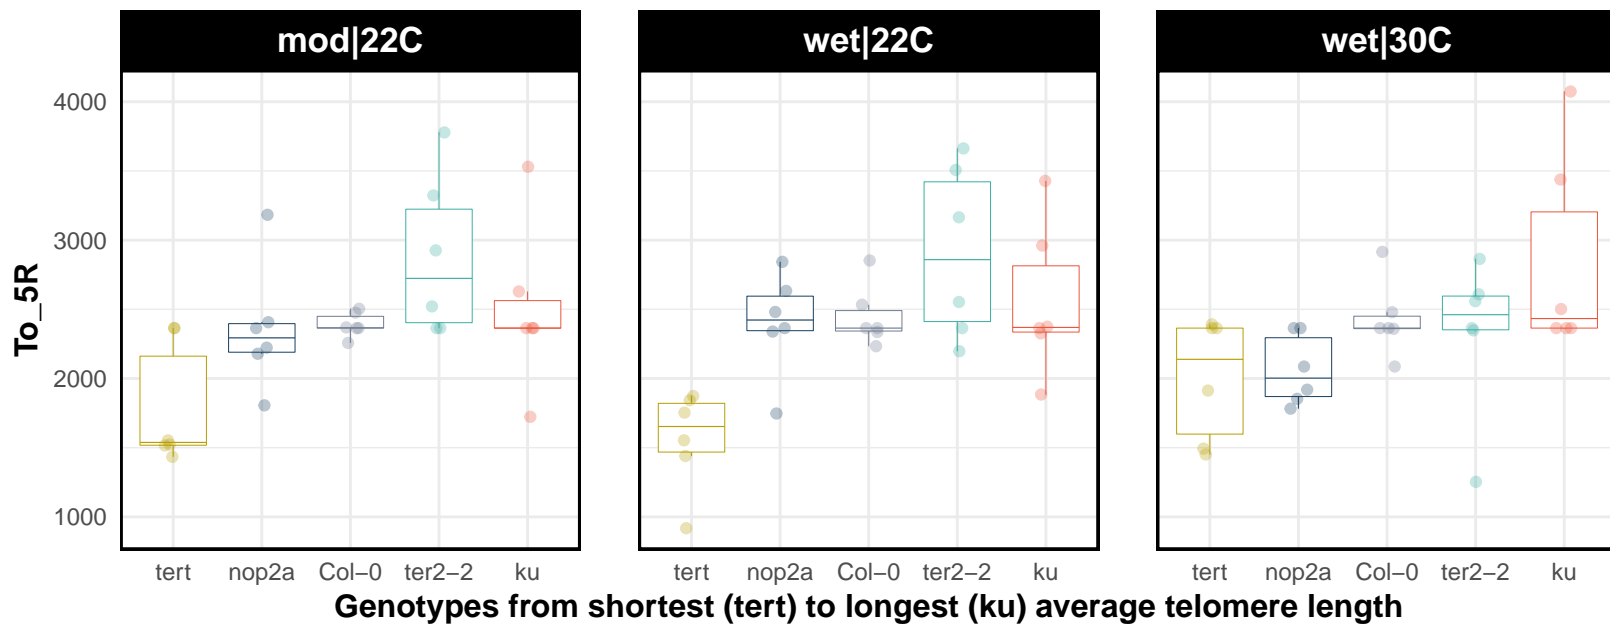

## Tf\_5R boxplots

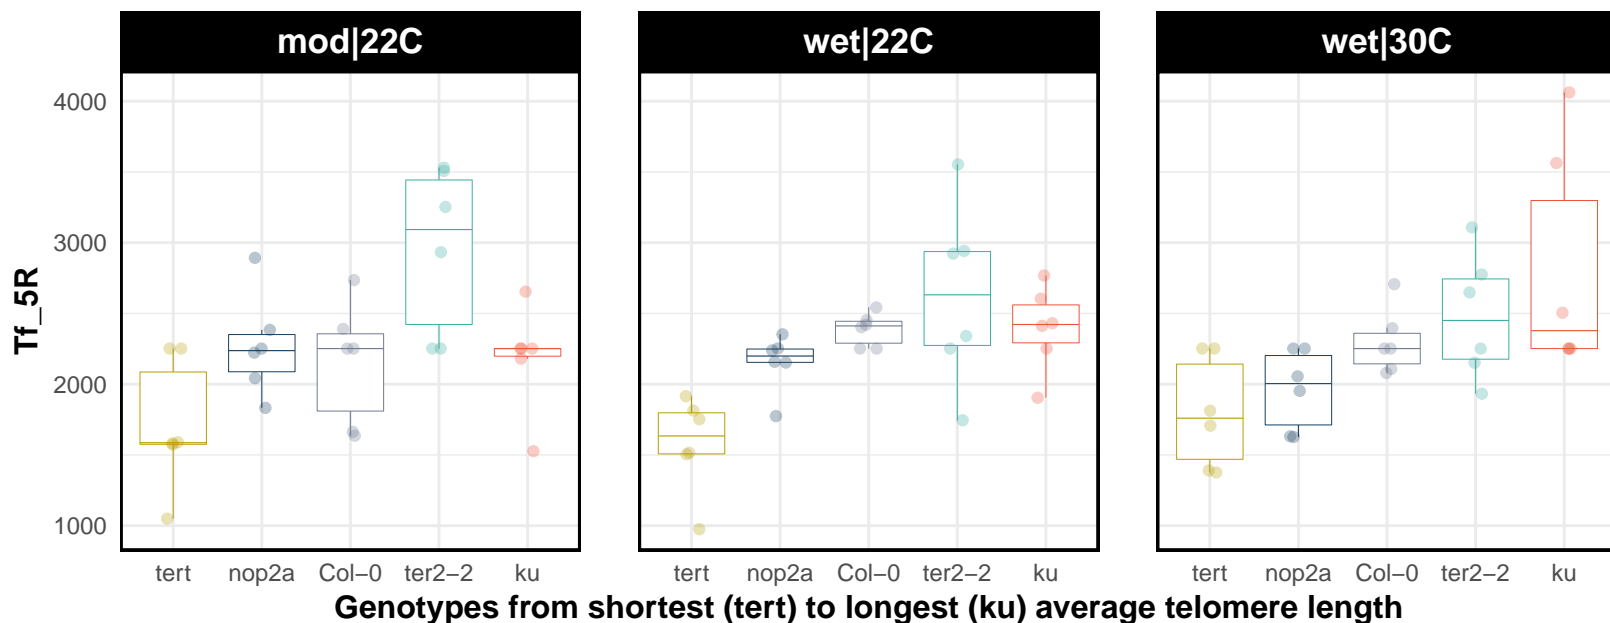

## Tf\_To\_5R boxplots

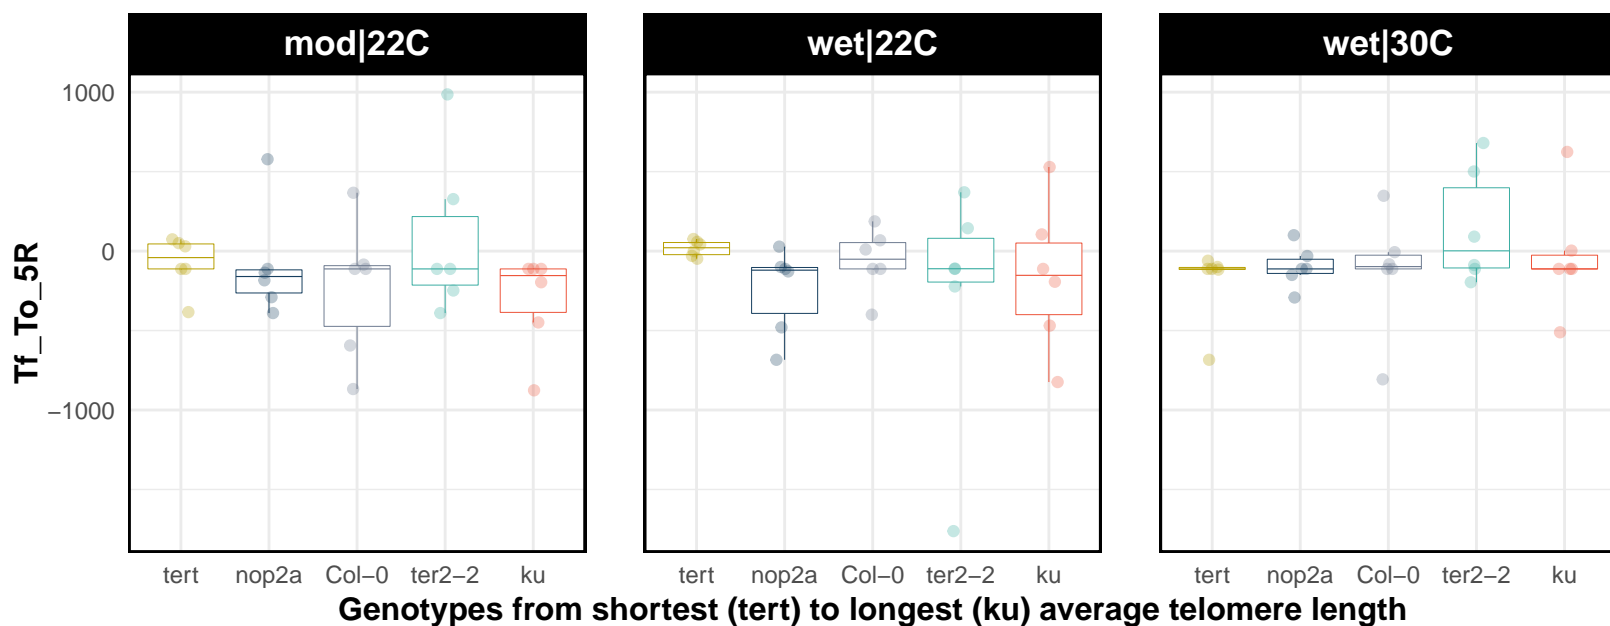

## AvgTo boxplots

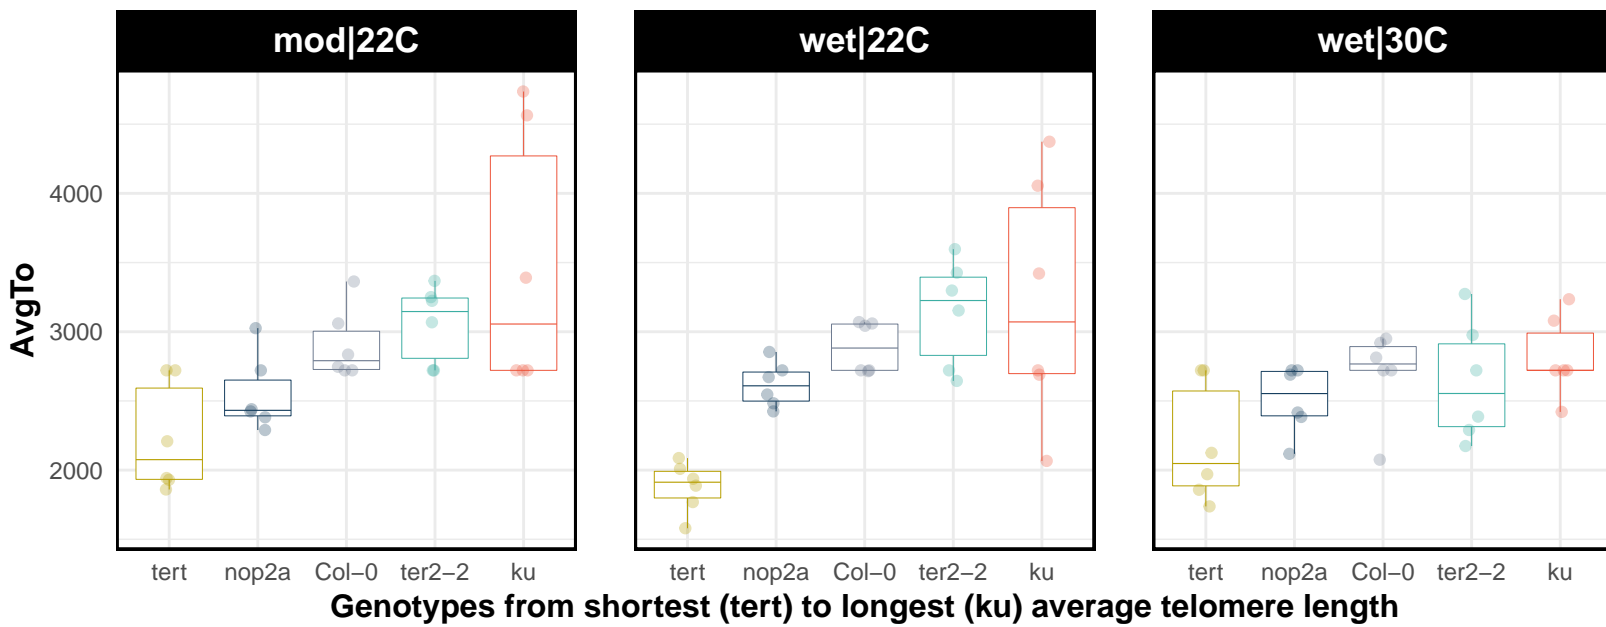

## AvgTf boxplots

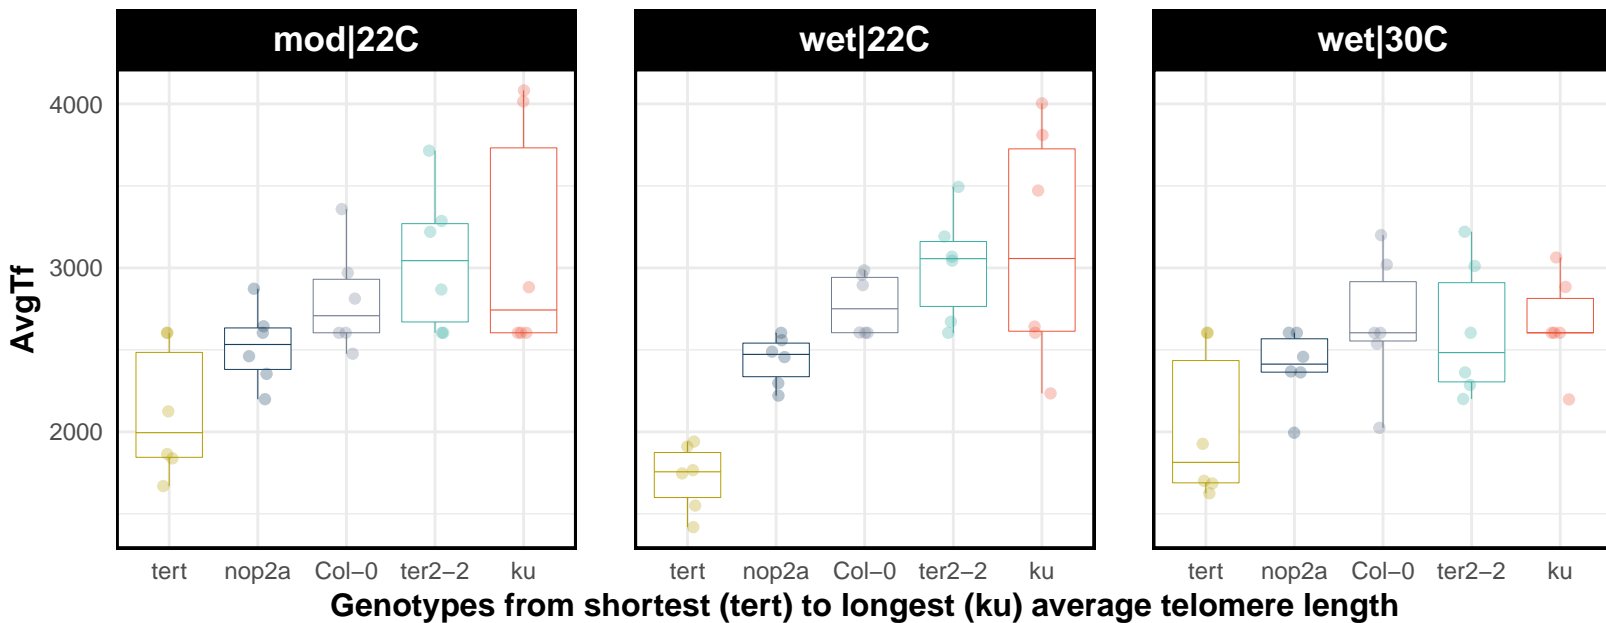

## AvgTf\_AvgTo boxplots

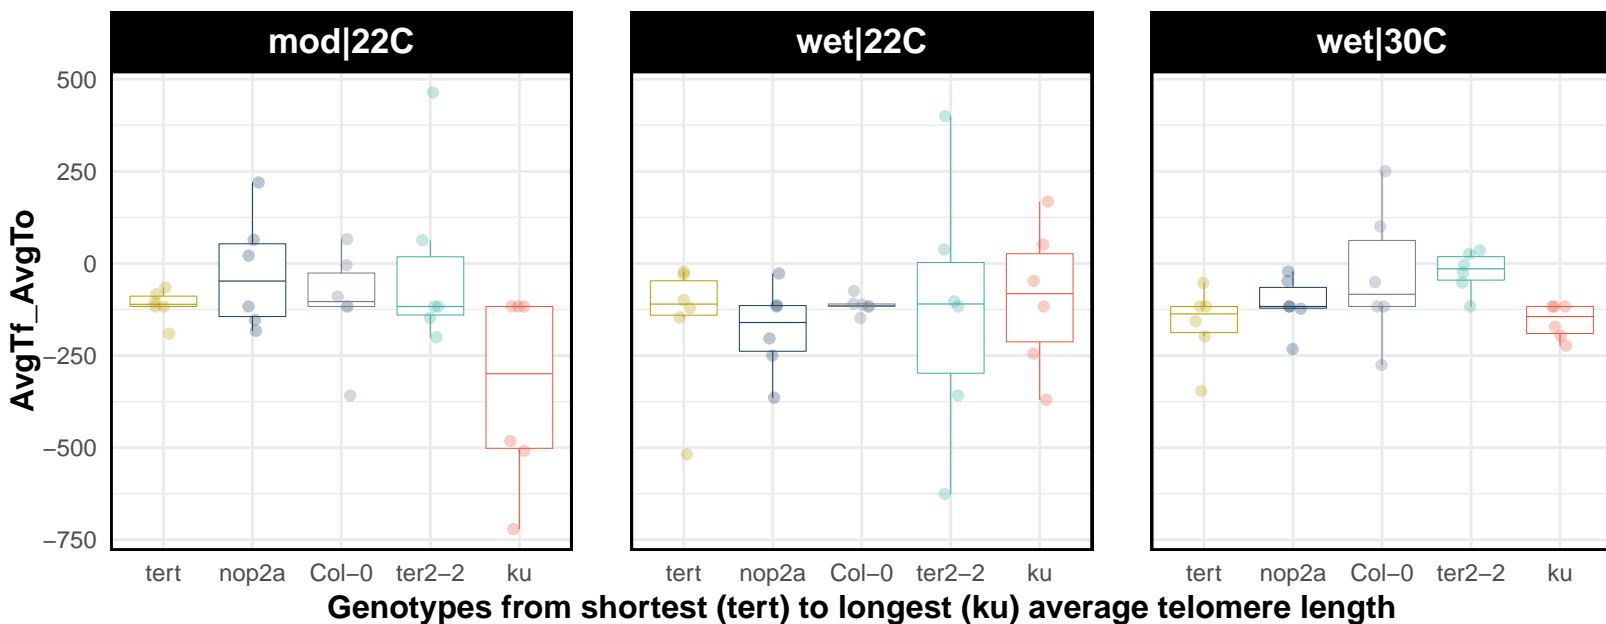

## PropTeloChange boxplots

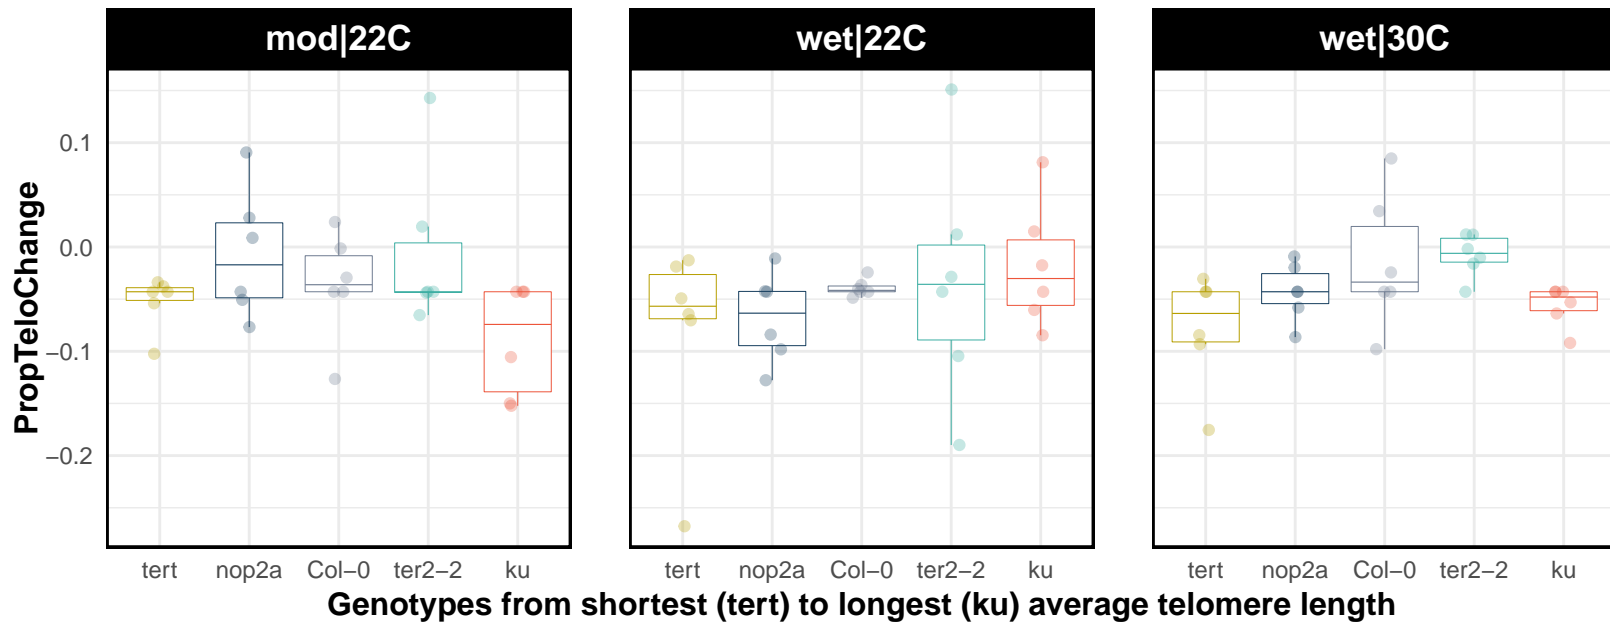

## FlowerDay boxplots

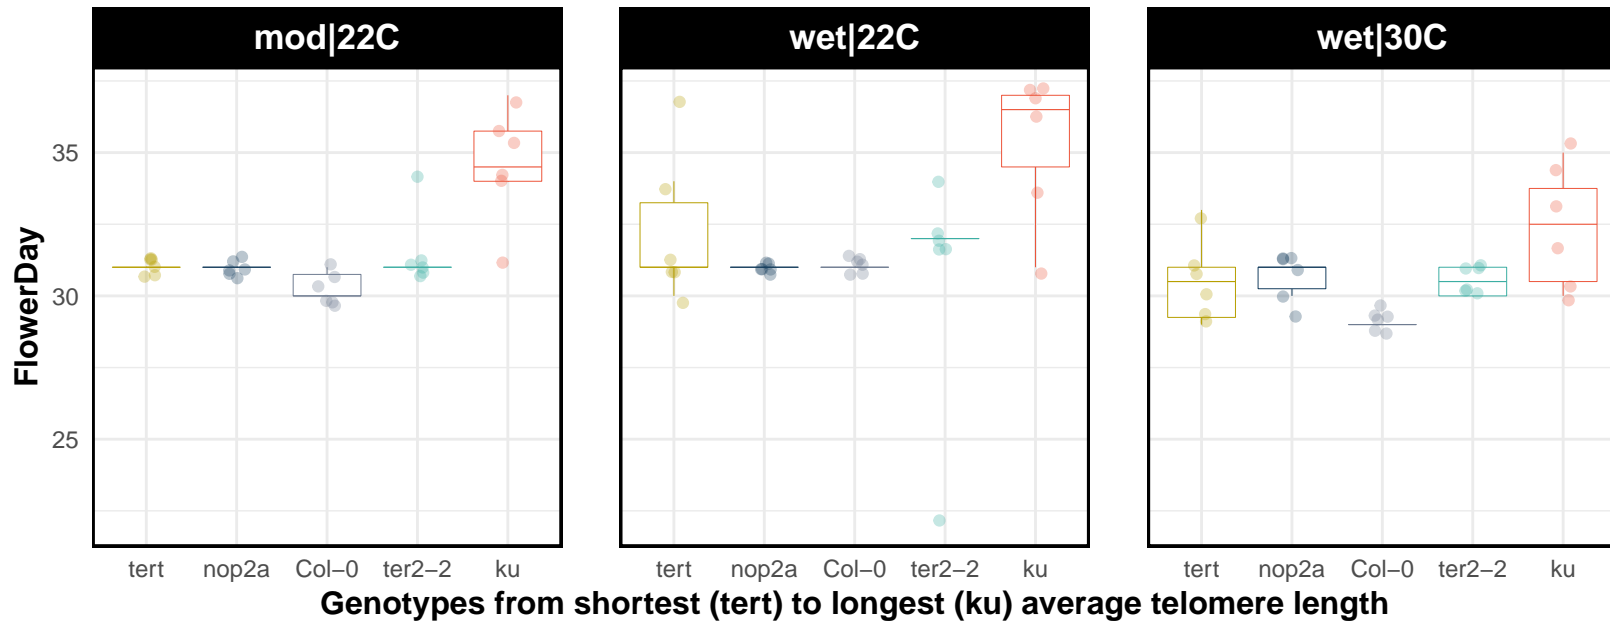

## PrmBolts boxplots

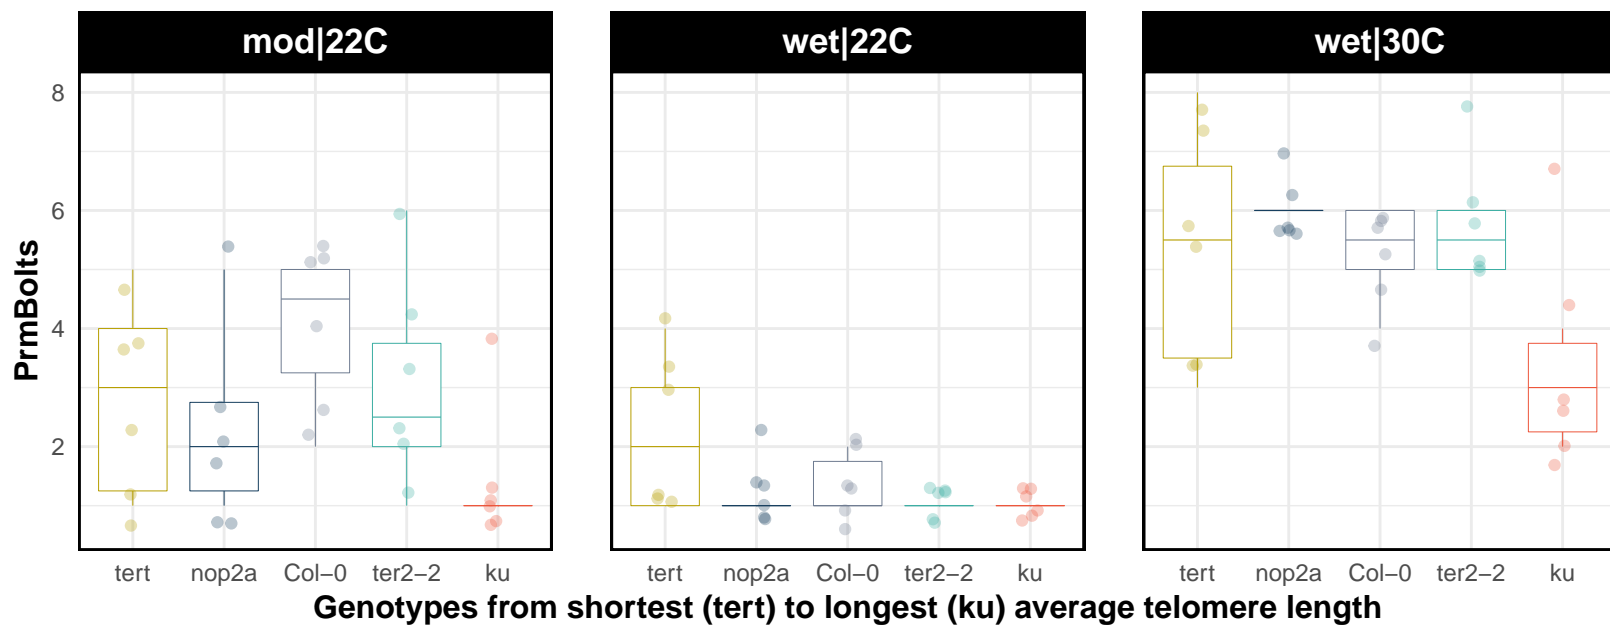

## SecBolts boxplots

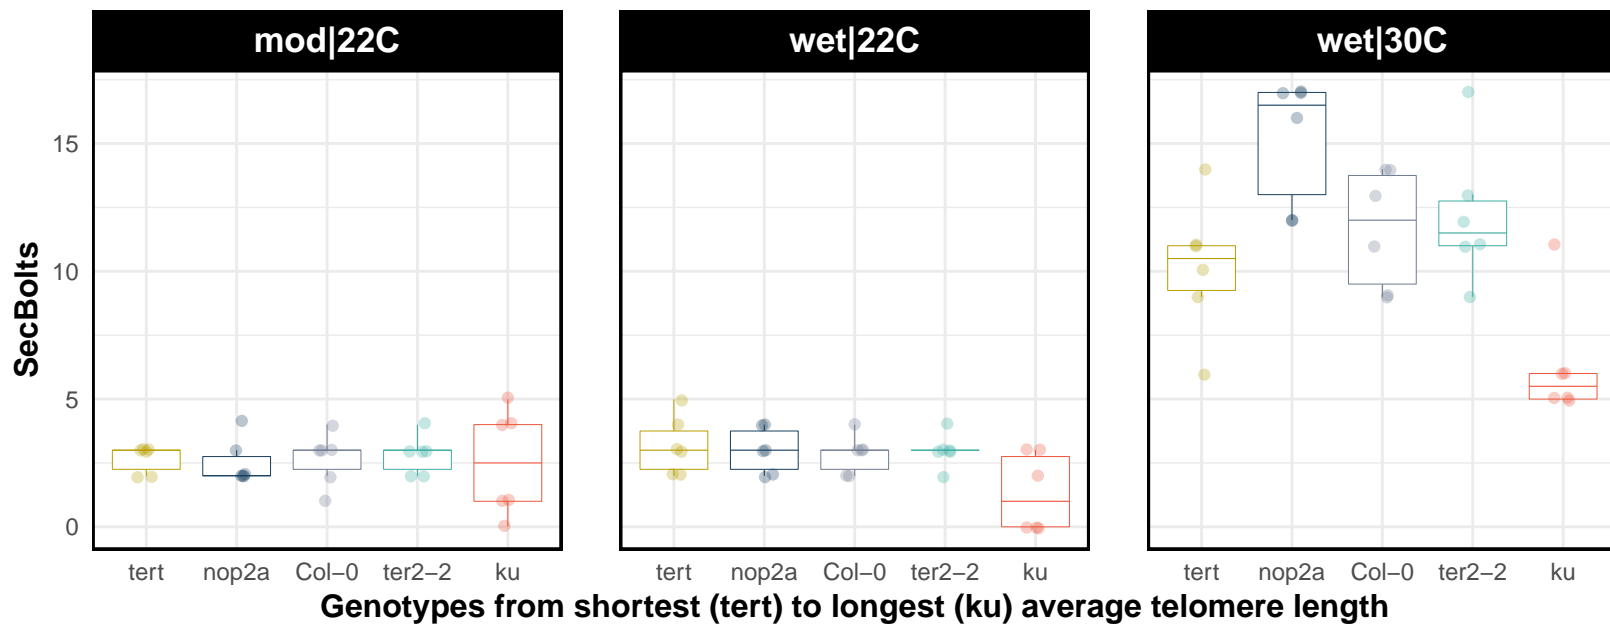

## Height boxplots

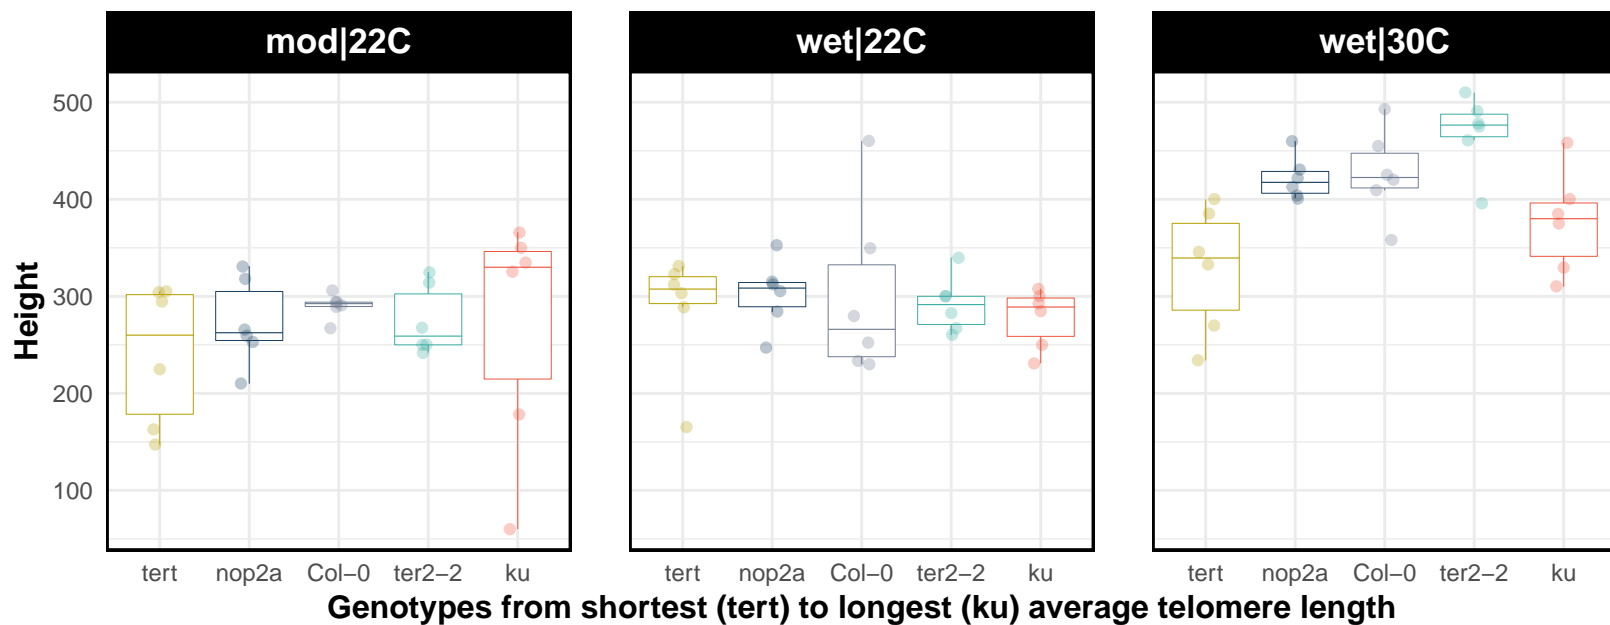

## BoltThickness boxplots

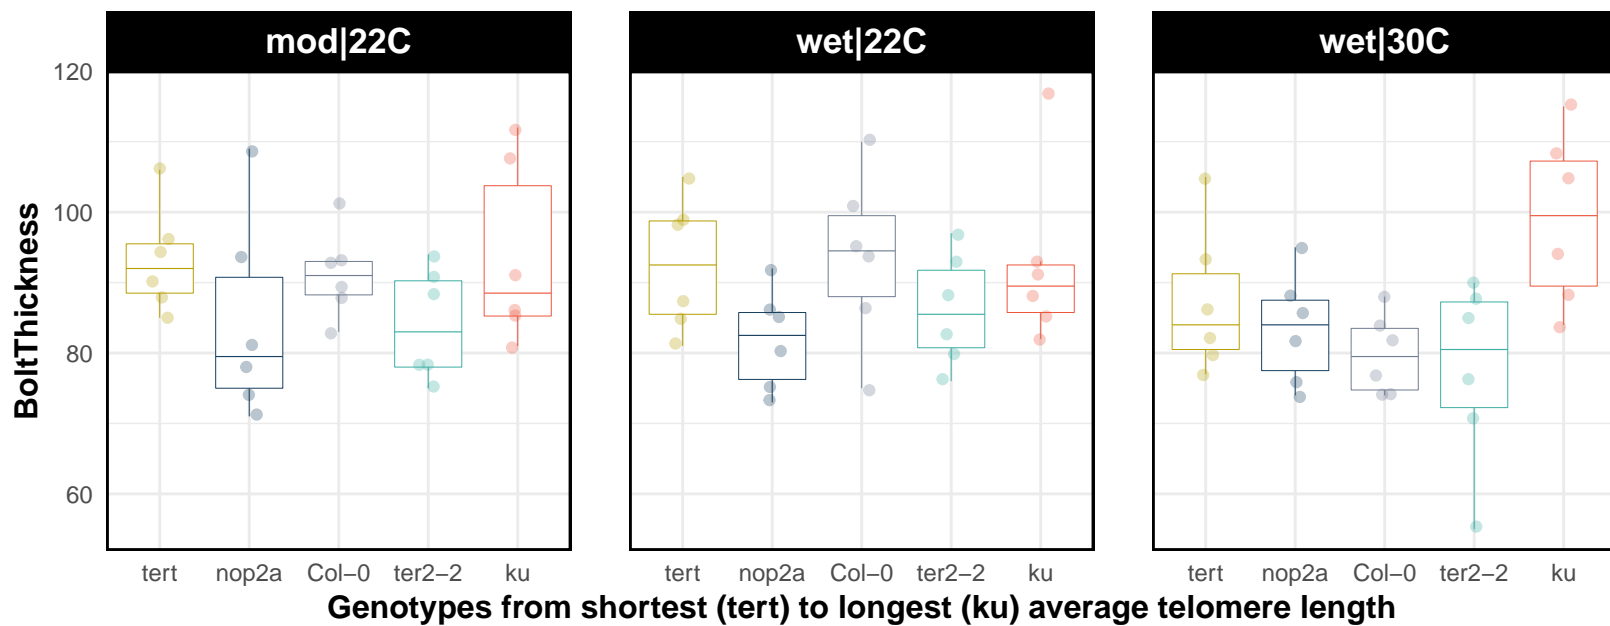

## RWC1 boxplots

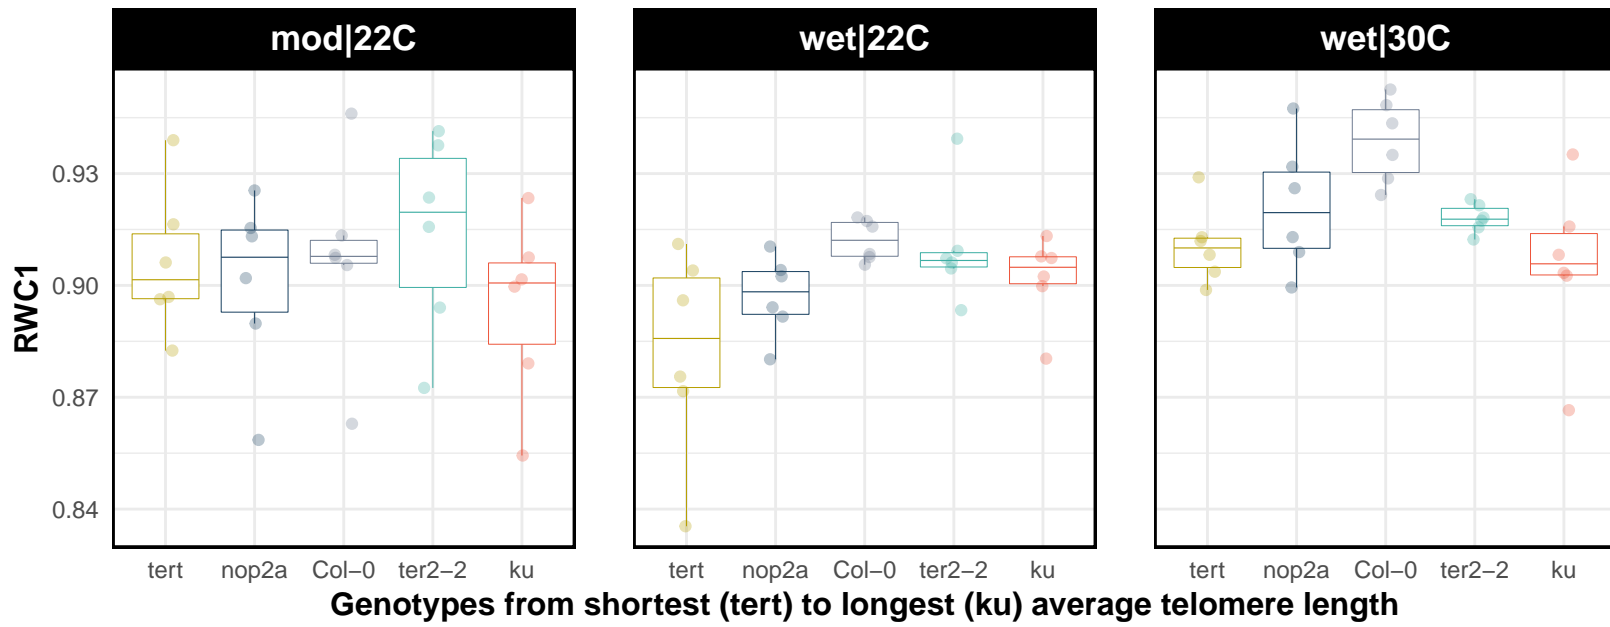

## OP boxplots

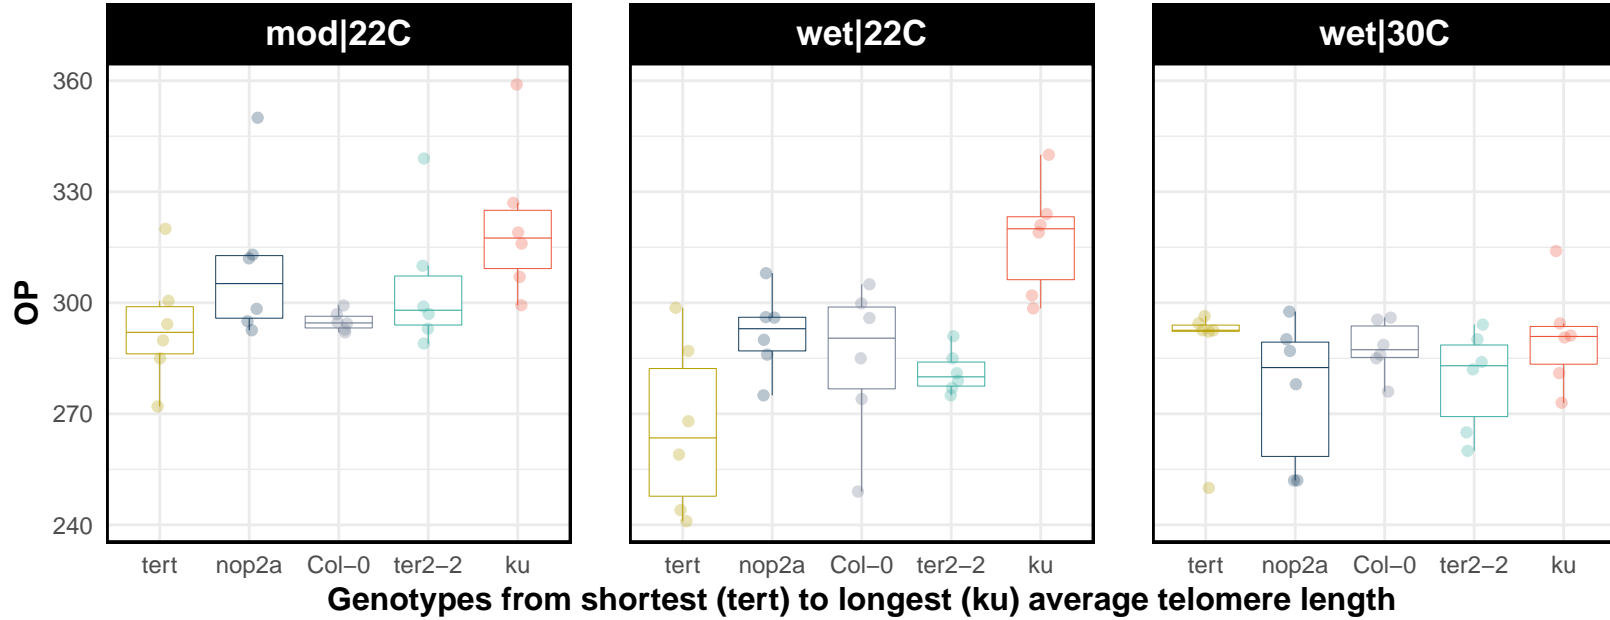

## TotCh1 boxplots

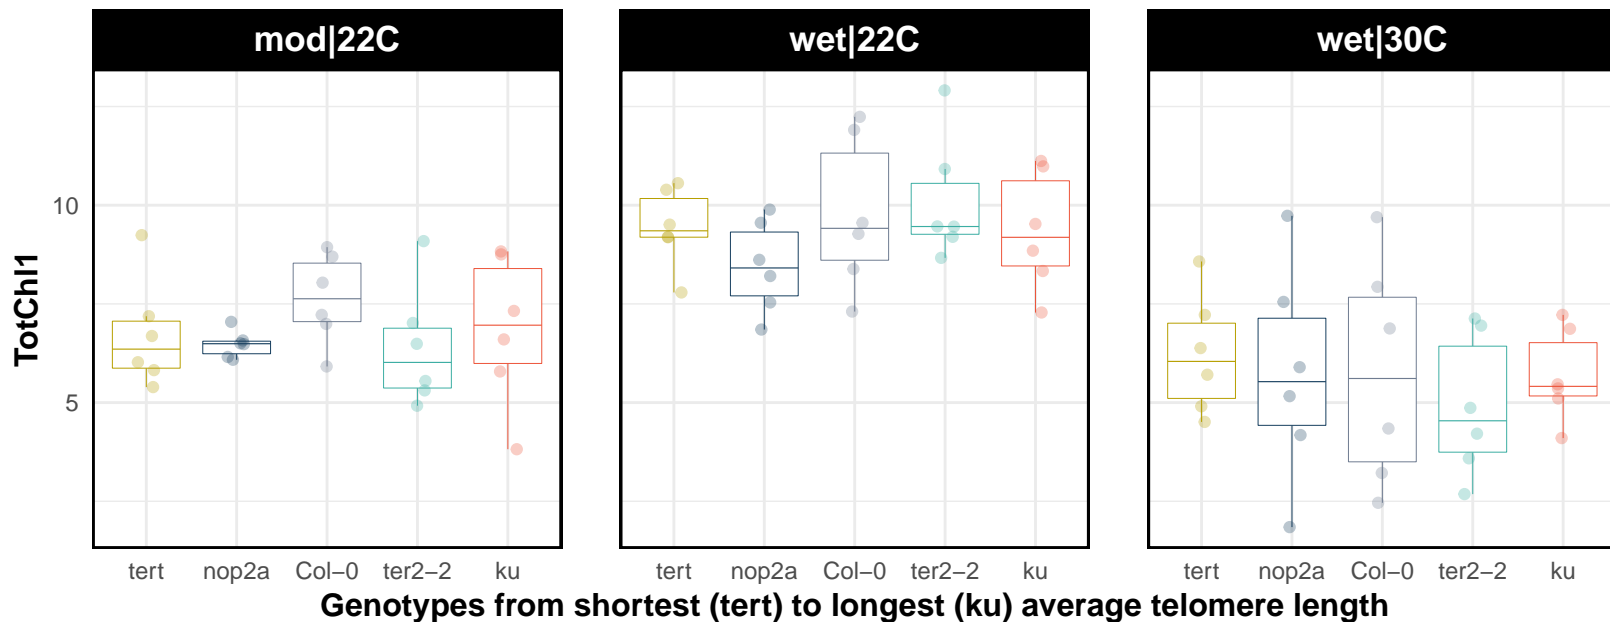



## Proline1 boxplots

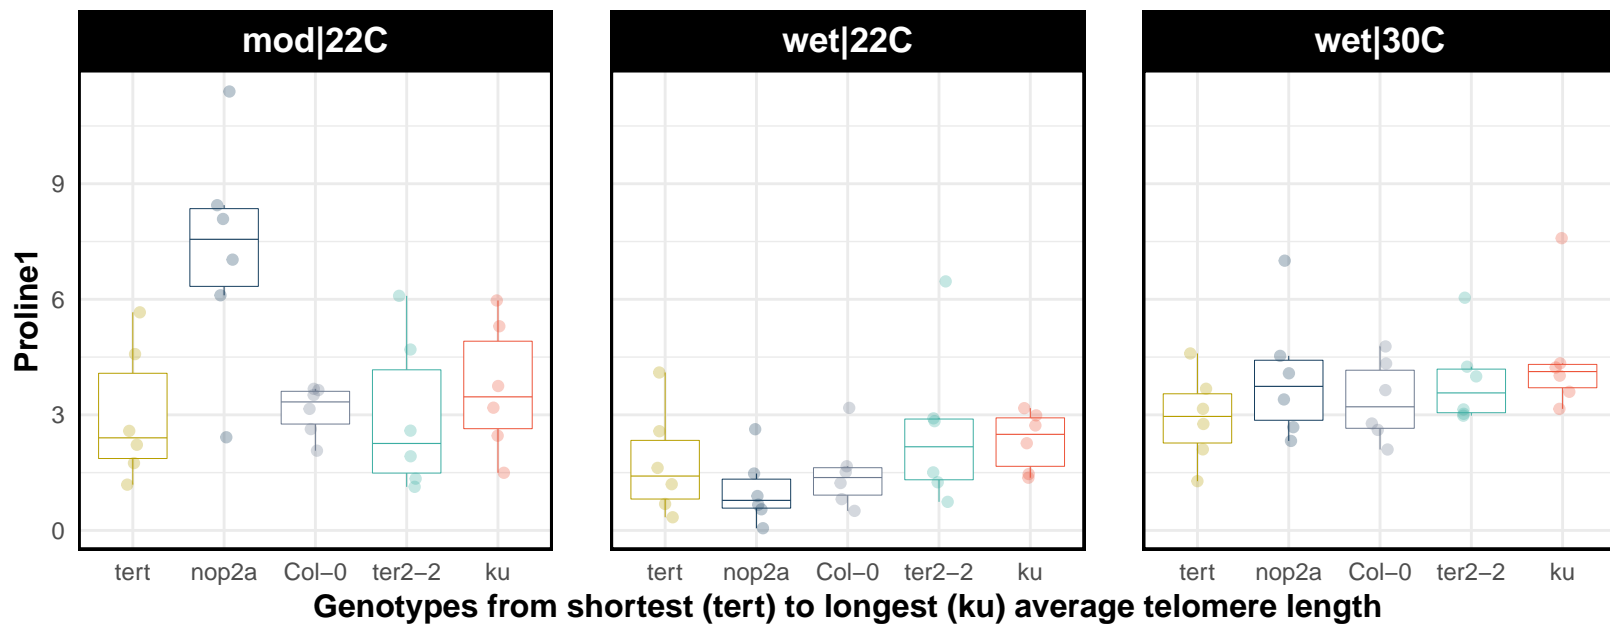

## StomArea boxplots

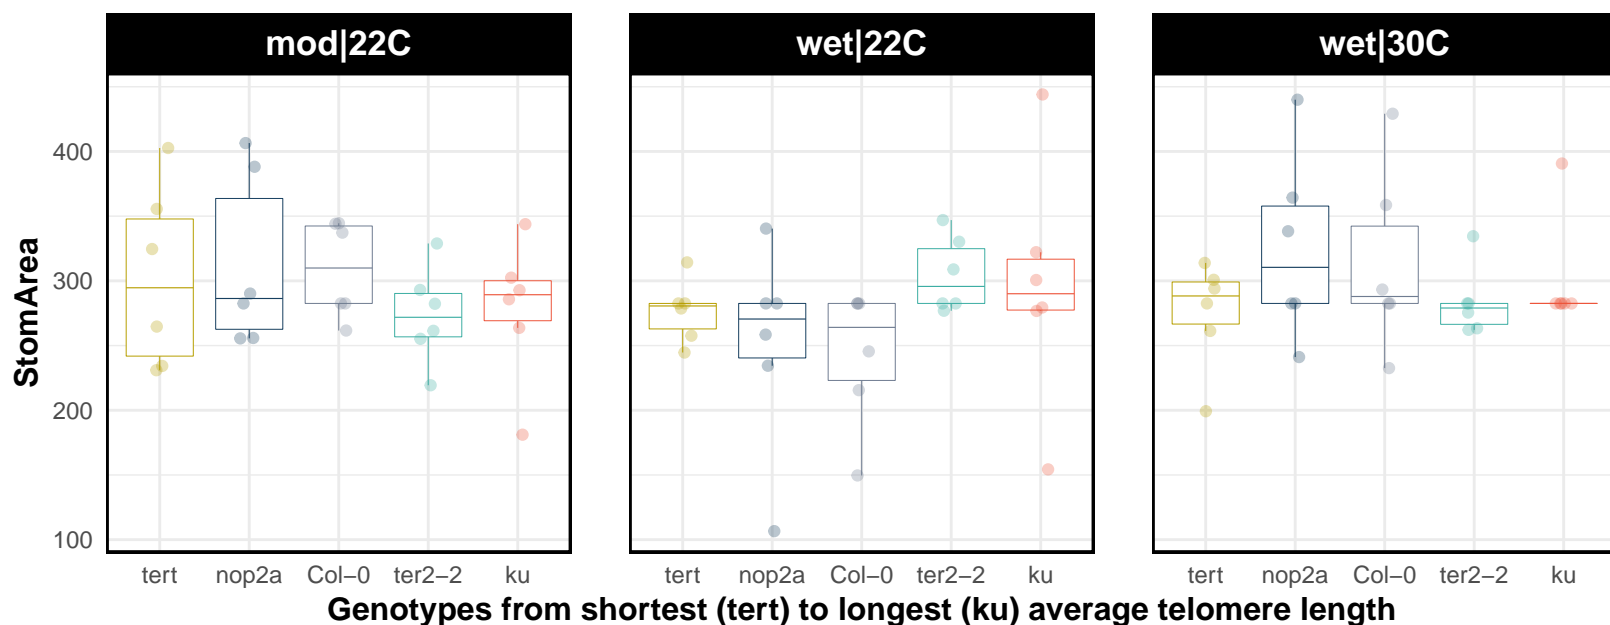

## StomDensity boxplots

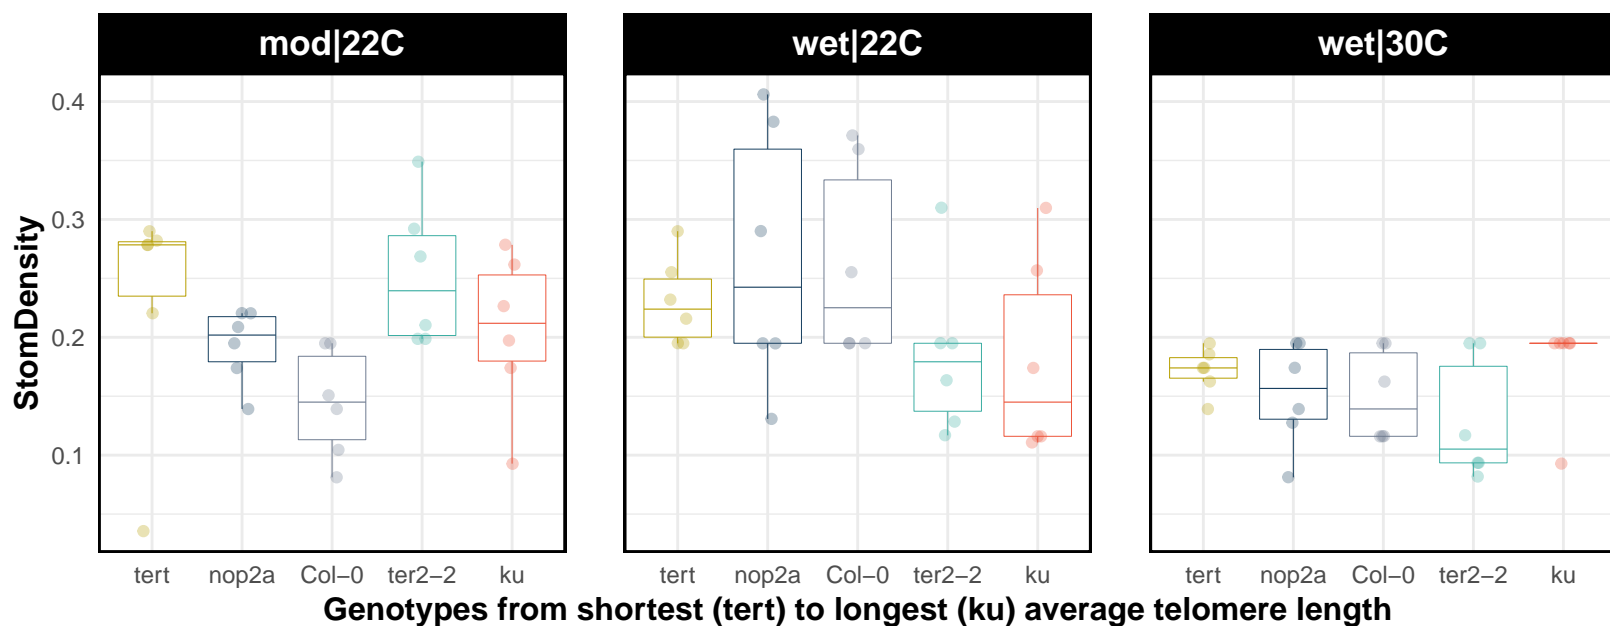

## StomArea\_PerArea boxplots

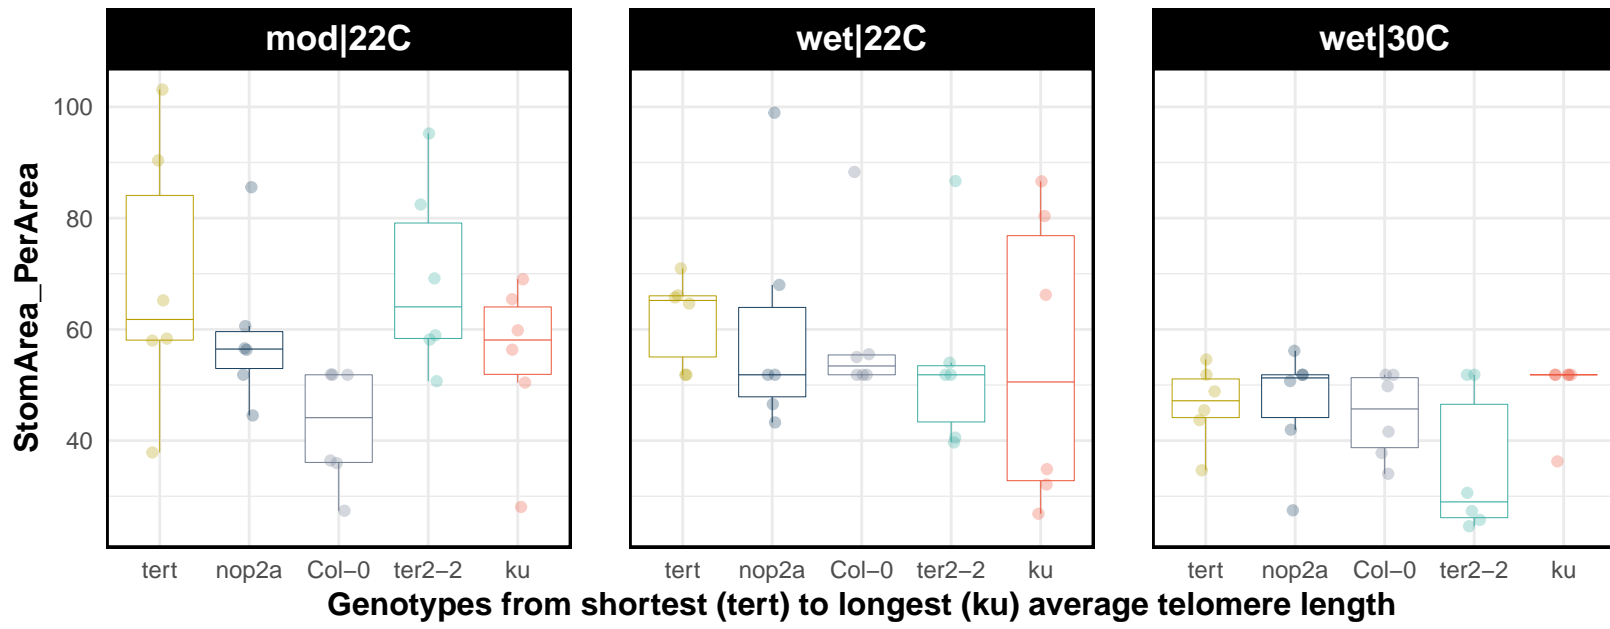

## EP\_Area boxplots

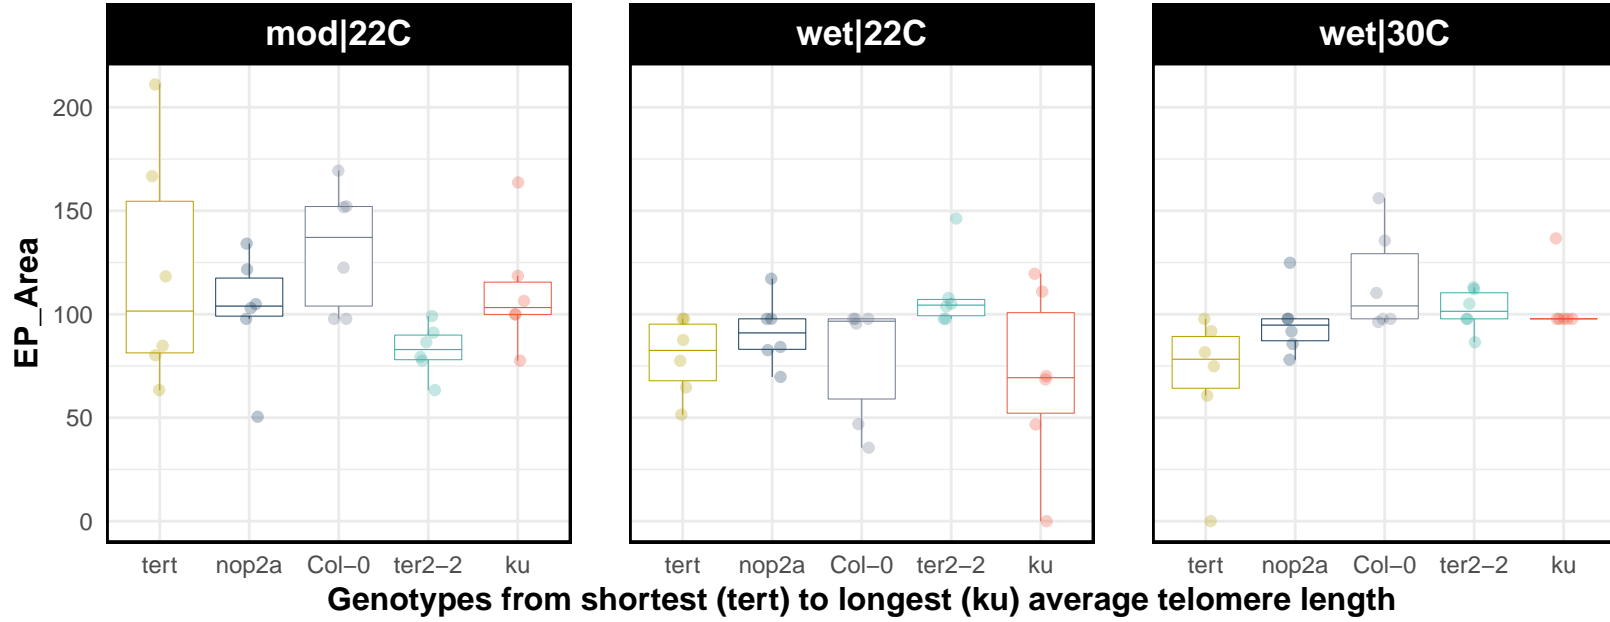

## SI boxplots

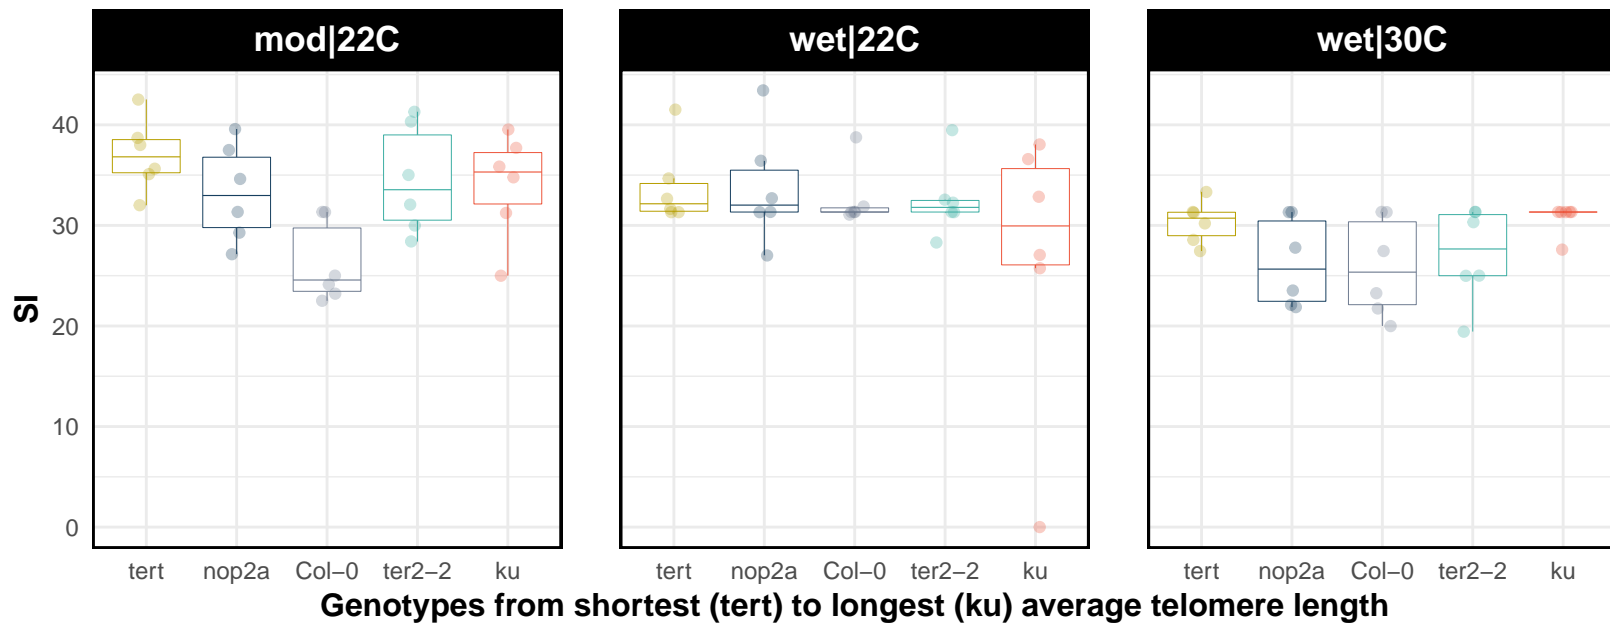

## Stom\_EP\_Ratio boxplots

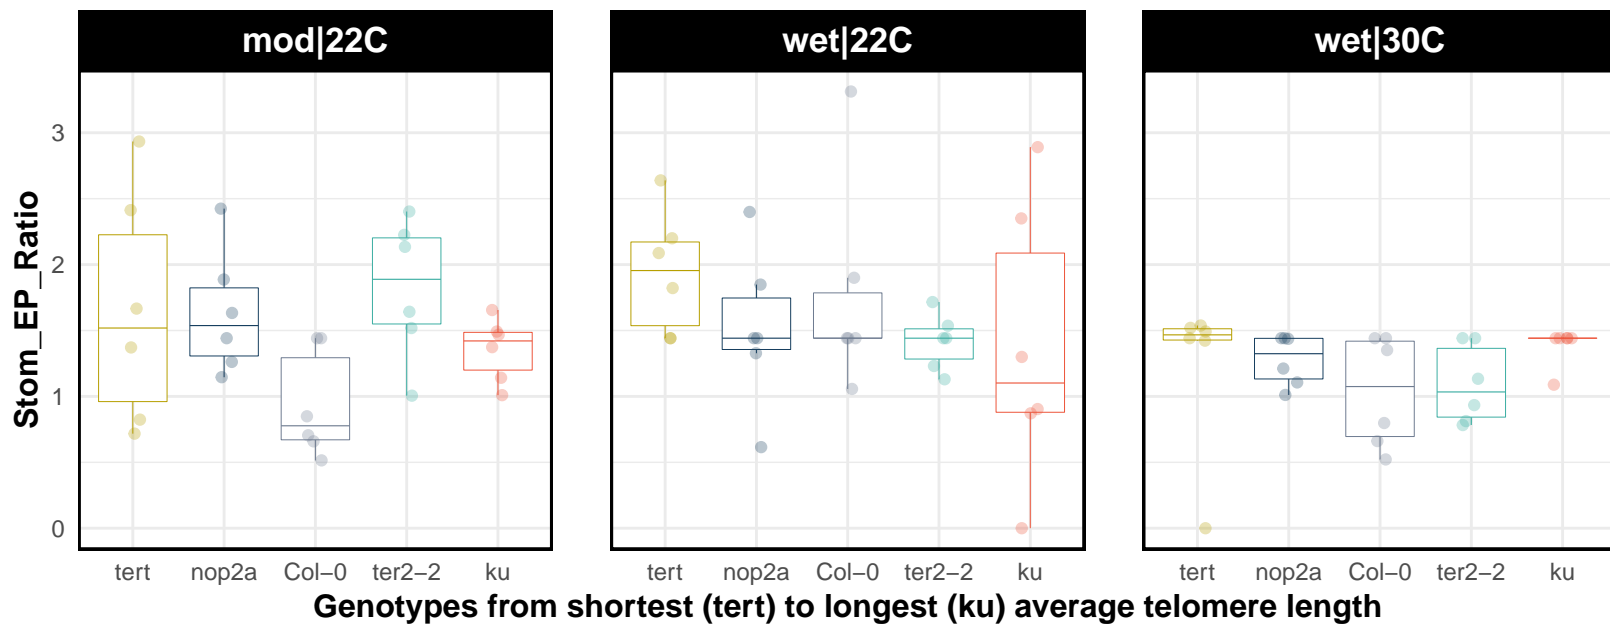

## TotalSeeds boxplots

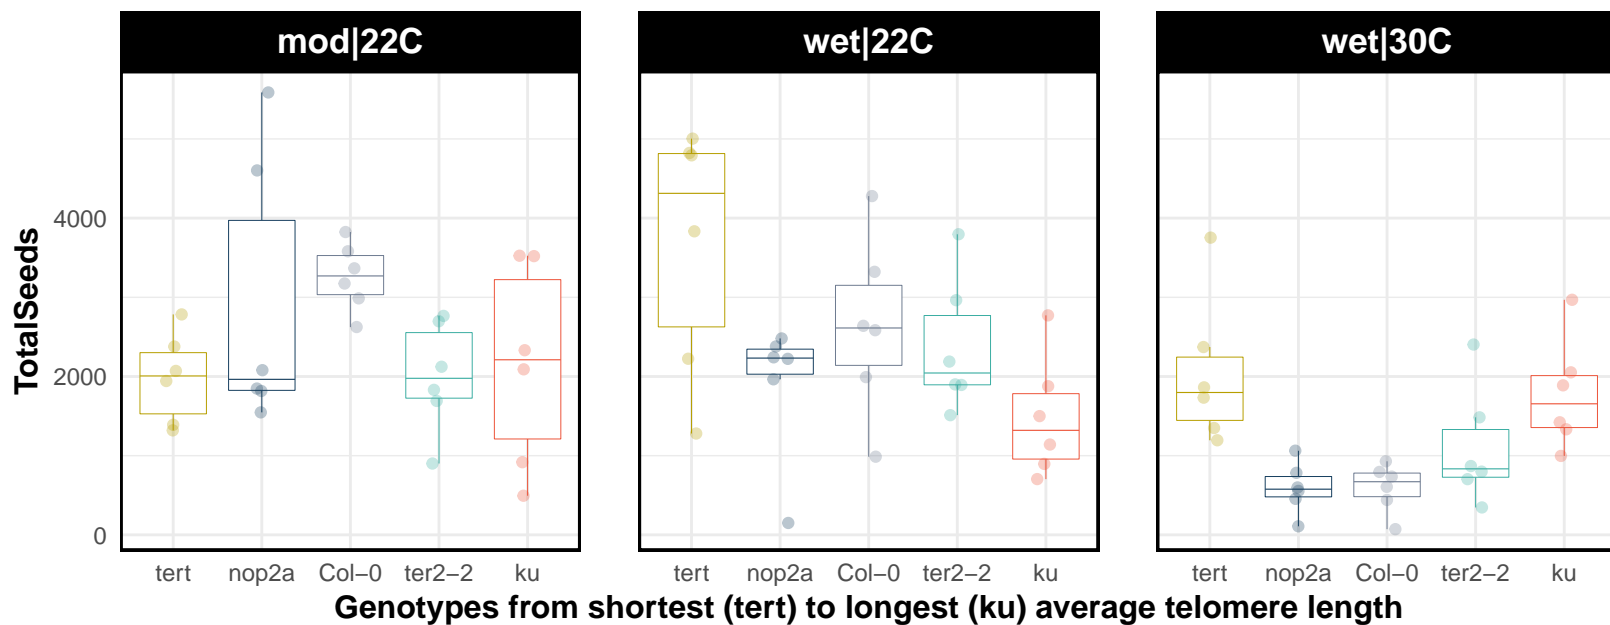

## DryWeight boxplots

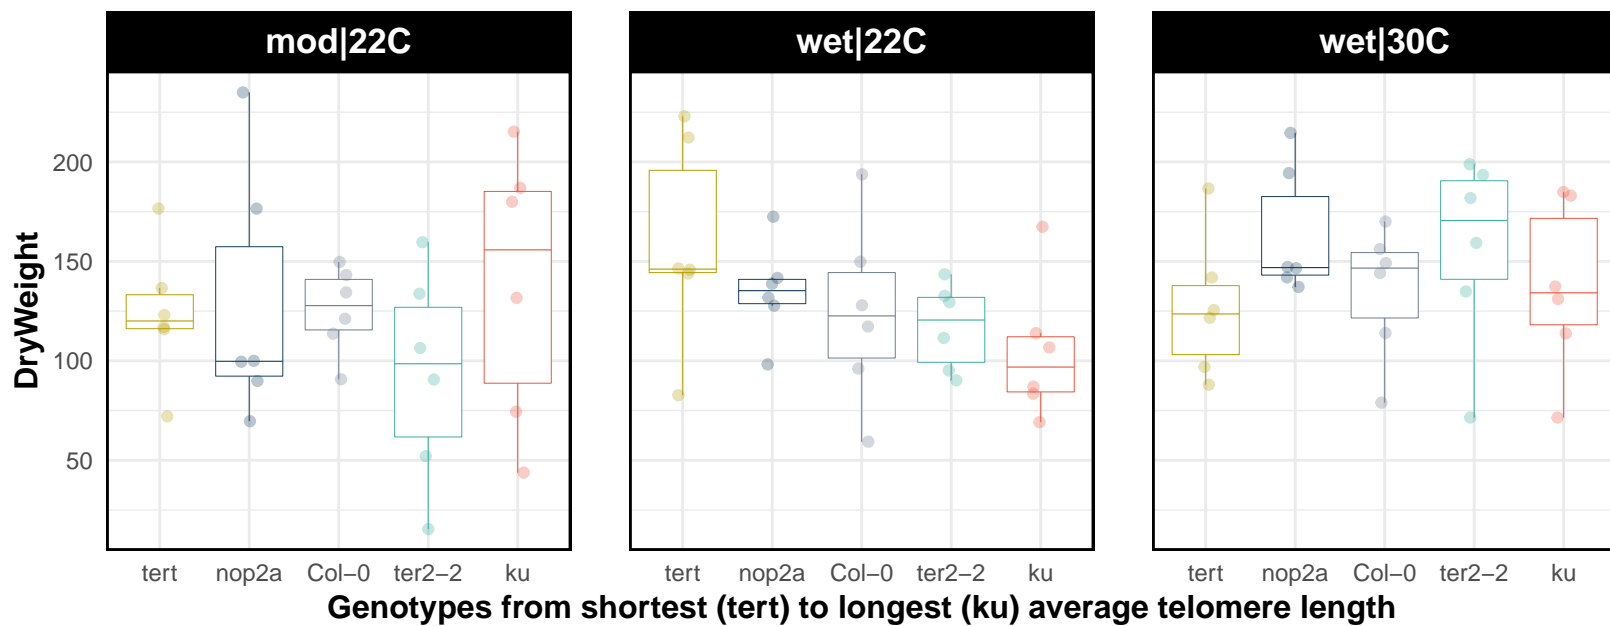

Leaves boxplots

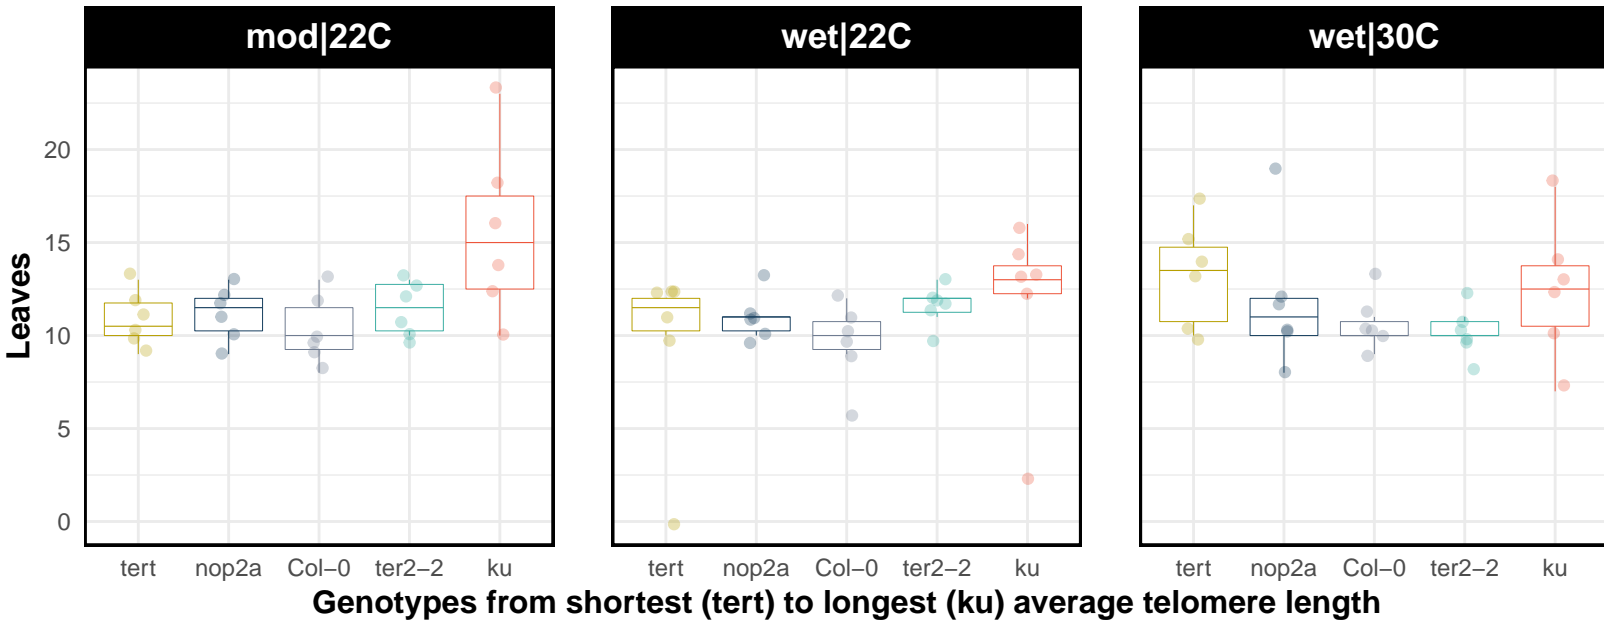

LeafThickness boxplots

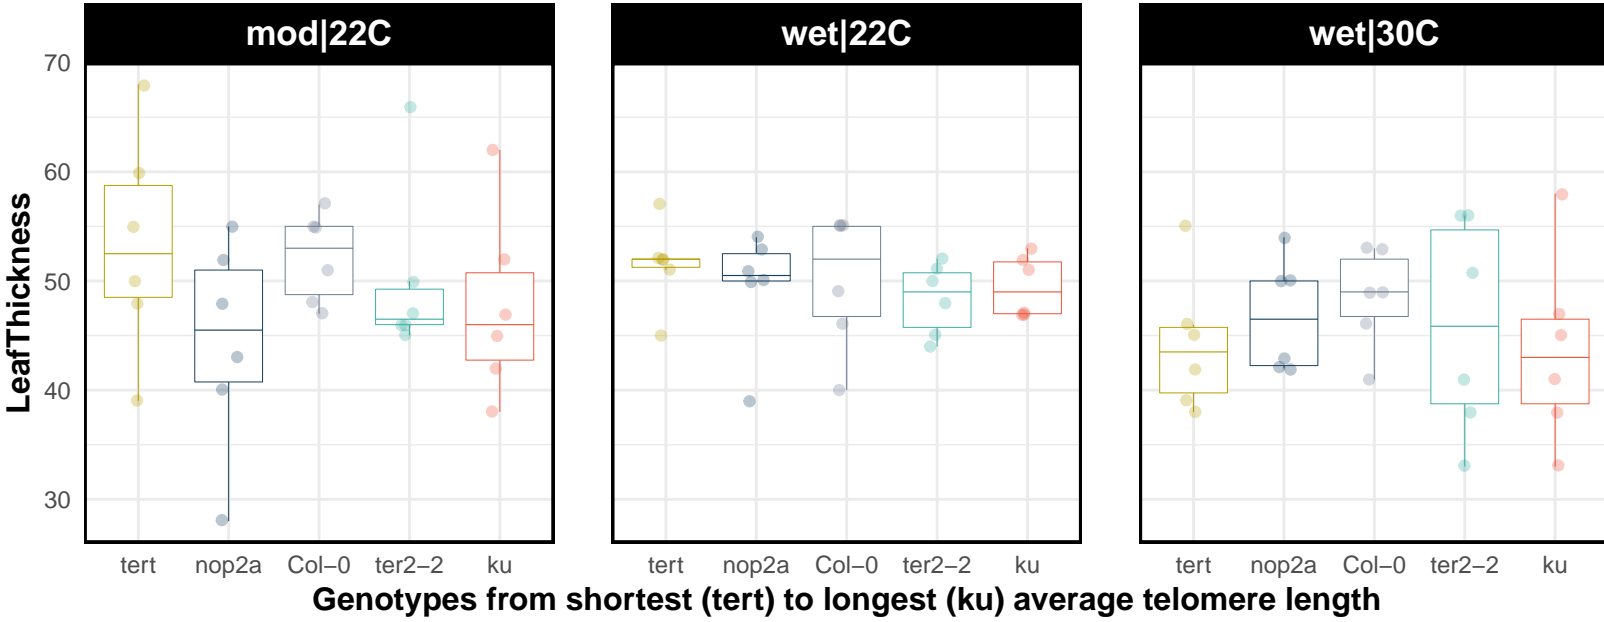

Supplement: NIHMS1814592-supplement-Supplemental_Data_4.pdf [file NIHMS1814592-supplement-Supplemental_Data_4.pdf]
